# Supplementary material
Source: PubMed Central journal article supplement (PMC5686343)
Supplement: cdd2017125x1.pdf [file cdd2017125x1.pdf]

# Supplementary Figure S1

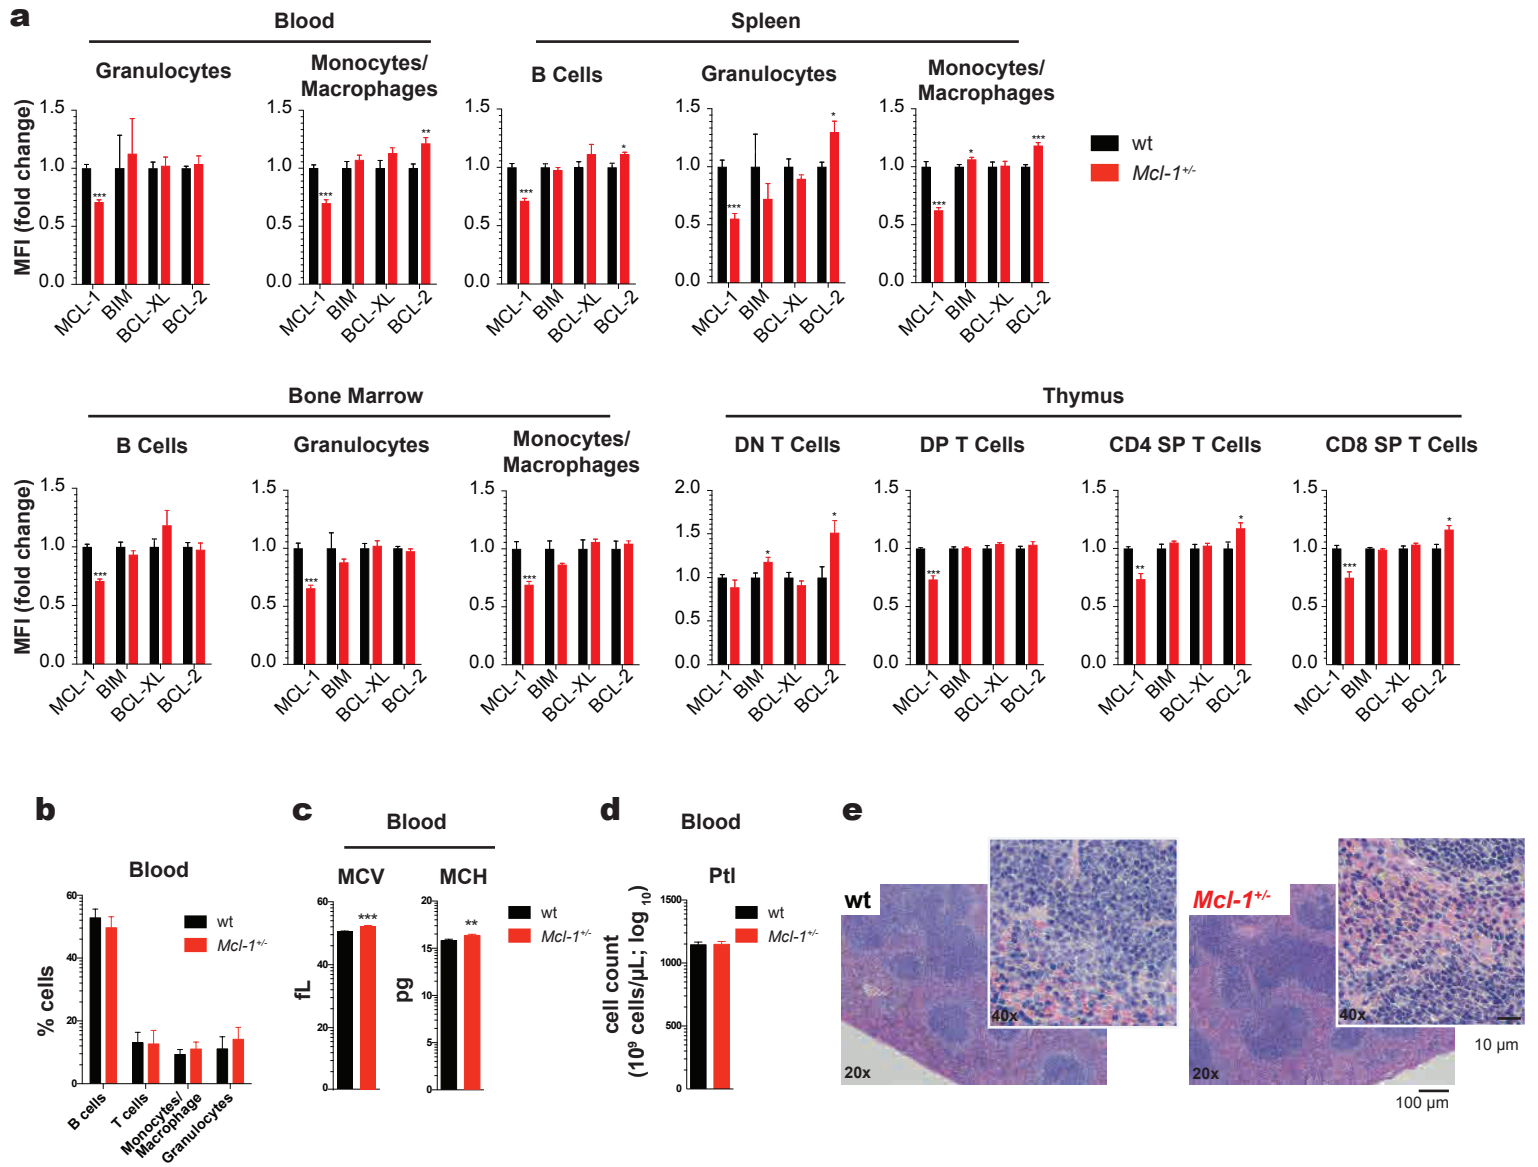

## Supplementary Figure S2: Overview of chemotherapeutic drugs and treatment regimes

| Name                                                           | Treatment Protocol                           | Mechanism of Action                                                                                                           | Clinical Relevant Treatment                                                 |
|----------------------------------------------------------------|----------------------------------------------|-------------------------------------------------------------------------------------------------------------------------------|-----------------------------------------------------------------------------|
| <b>Fluorouracil (5-FU, Aduvicol)</b>                           | 1 x 100 mg/kg body weight, i.v.              | inhibits thymidylate synthase and thereby decreases the supply of thymidine                                                   | diverse haematological malignancies and several solid cancers (e.g. HL, MM) |
| <b>Cytarabine (cytosine arabinoside, ara-C)</b>                | 3 x 80 mg/kg body weight, i.v. (d1, d2, d3)  | deoxycytidine triphosphate analog, which is incorporated into DNA during synthesis, causing a stop in DNA replication         | AML, ALL, non-HL                                                            |
| <b>Hydroxyurea (Hydroxycarbamide, Hydrea, Litalir, Droxia)</b> | 3 x 100 mg/kg body weight, i.p. (d1, d2, d3) | suppresses ribonucleotide reductase, thereby decreasing the production of all deoxyribonucleotides required for DNA synthesis | MDS, CML                                                                    |
| <b>Etoposide (Etopophos, Toposar)</b>                          | 1 x 2 mg/kg body weight, i.v.                | inhibitor of topoisomerase II, induces DNA double-strand breaks                                                               | diverse haematological malignancies and several solid cancers (e.g. HL, MM) |
| <b>Doxorubicin (Adriamycin, Doxil, Caelyx, Myocet)</b>         | 2 x 2 mg/kg body weight, i.v. (d1, d2)       | DNA intercalating agent, induces DNA double-strand breaks                                                                     | diverse haematological malignancies and several solid cancers (e.g. HL, MM) |
| <b>Dexamethasone</b>                                           | 3 x 10 mg/kg body weight, i.v. (d1, d2, d3)  | steroid medication                                                                                                            | diverse haematological malignancies (e.g. MM)                               |
| <b>Paclitaxel (Taxol, Abraxane, Onxol)</b>                     | 3 mg/kg body weight, i.v. (d1, d2, d3)       | tubulin toxin                                                                                                                 | AML and several solid cancers                                               |

*i.v.=intravenous, i.p.= intraperitoneal, HL=Hodgkin's Lymphoma, MM=Multiple Myeloma, AML=Acute Myeloid Leukaemia, ALL=Acute Lymphoblastic Leukaemia, MDS=Myelodysplastic Syndrome, CML=Chronic Myeloid Leukaemia*

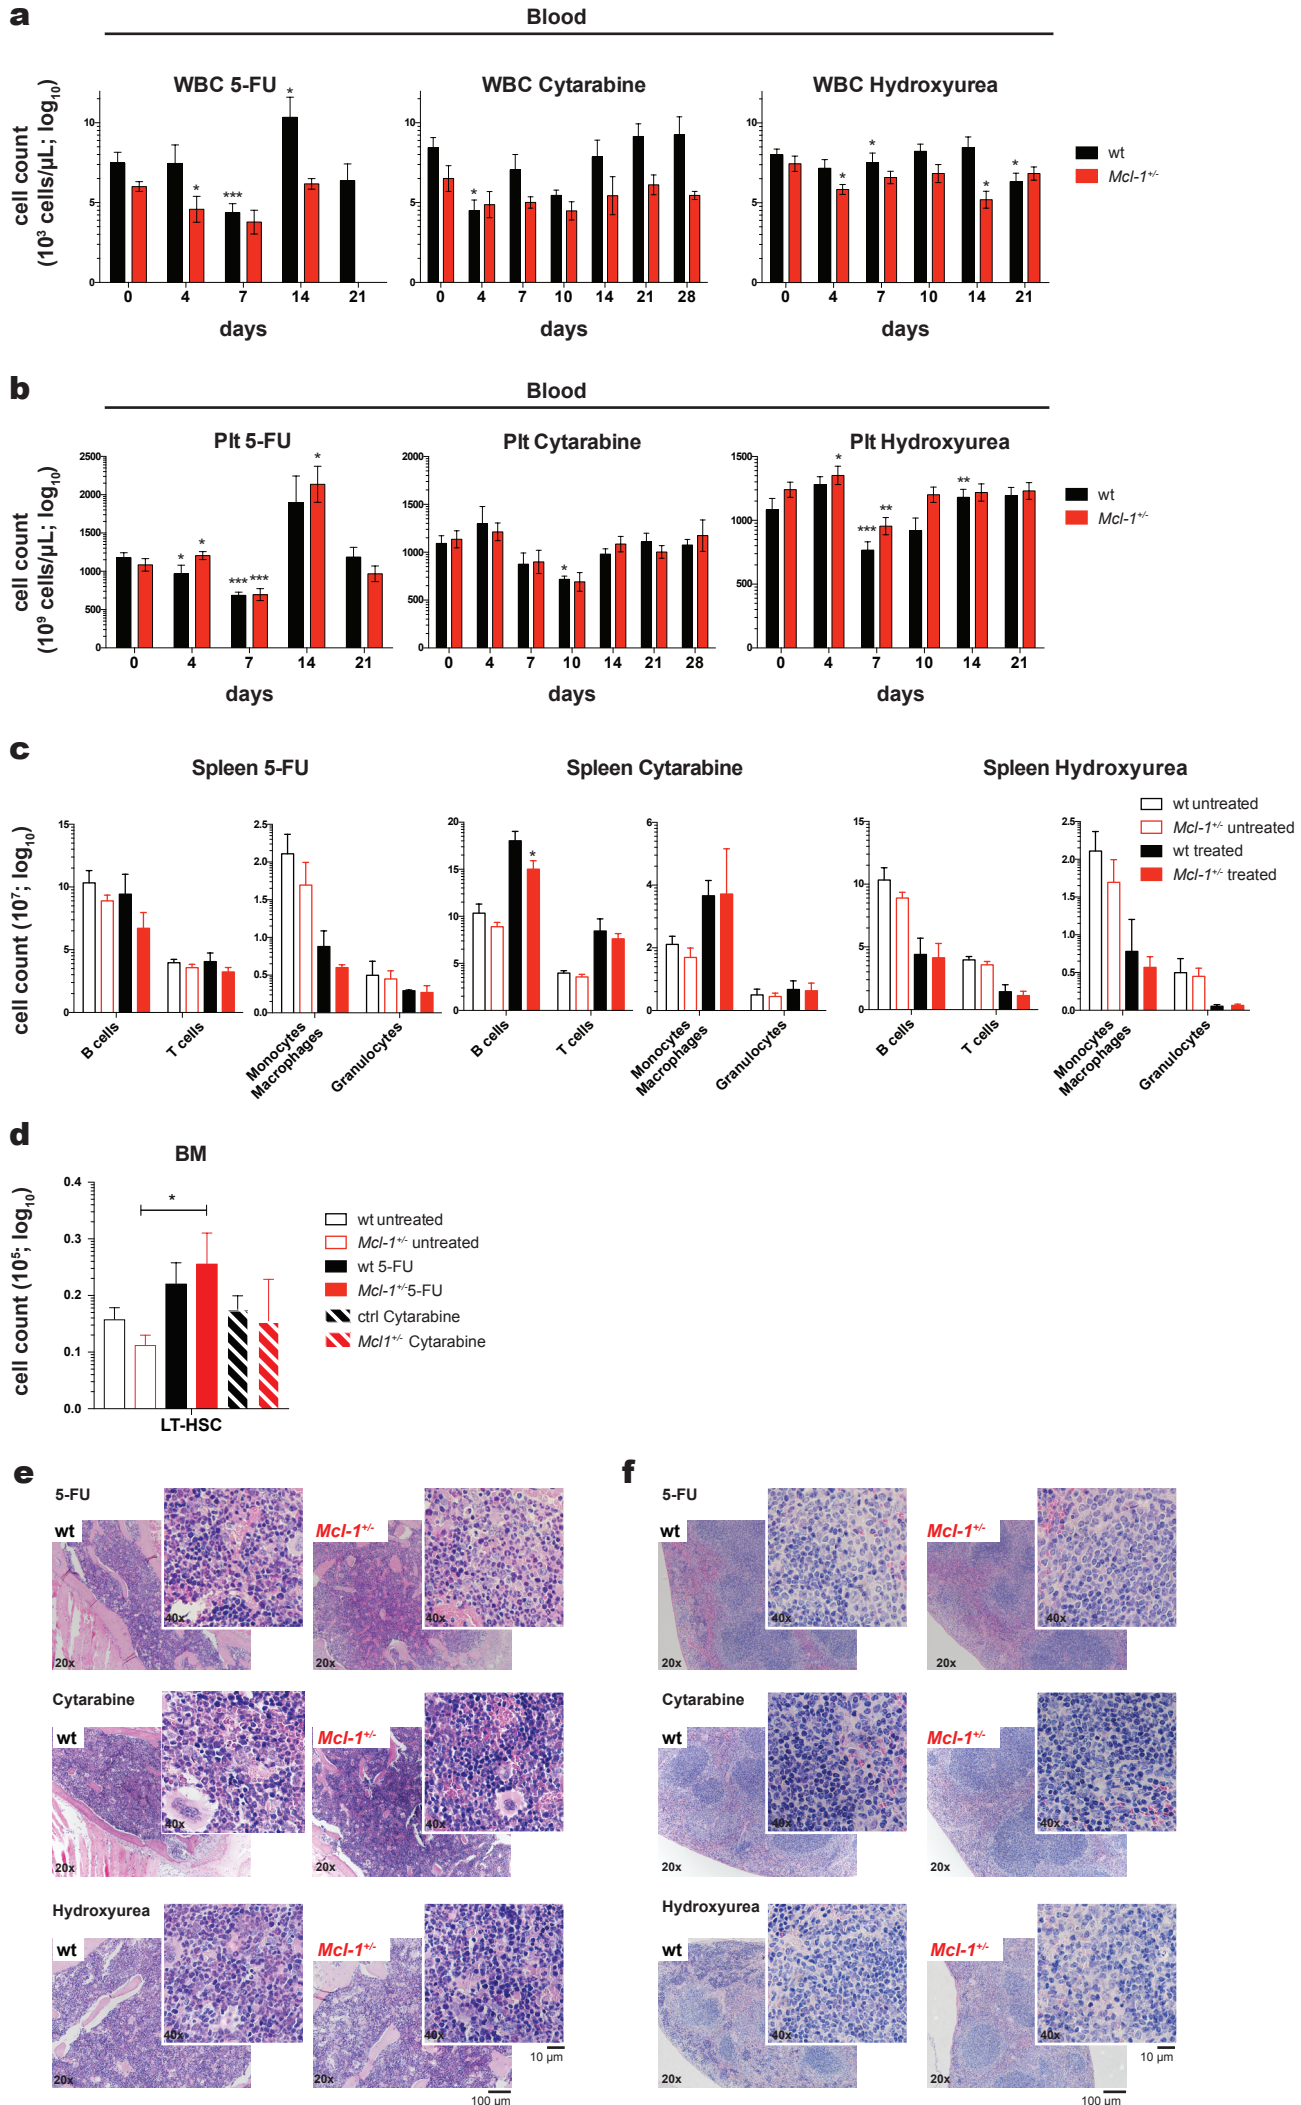

# Supplementary Figure S4

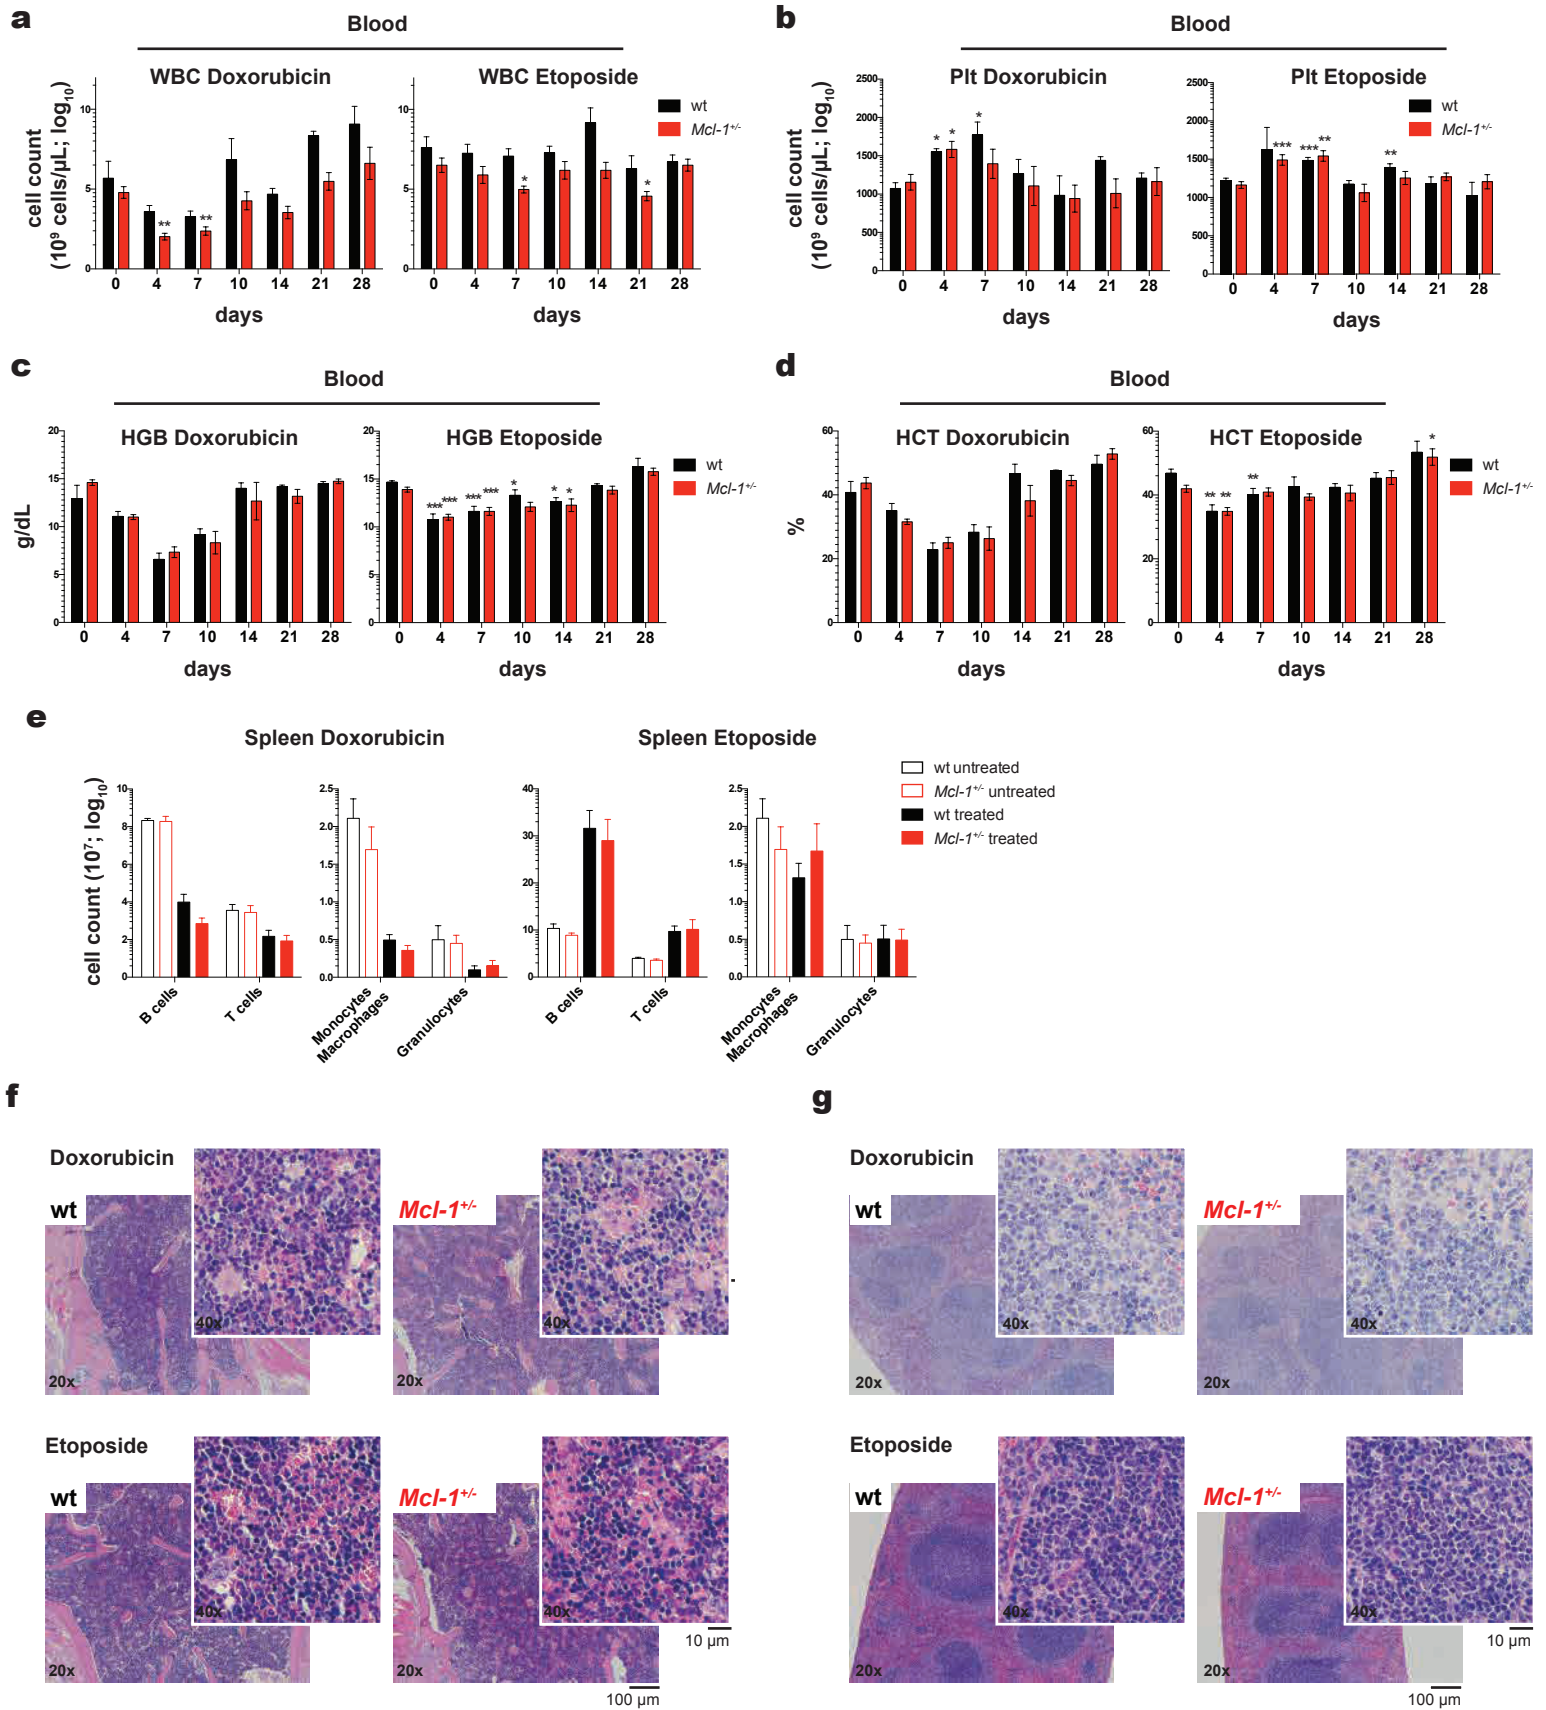



# Supplementary Figure S5

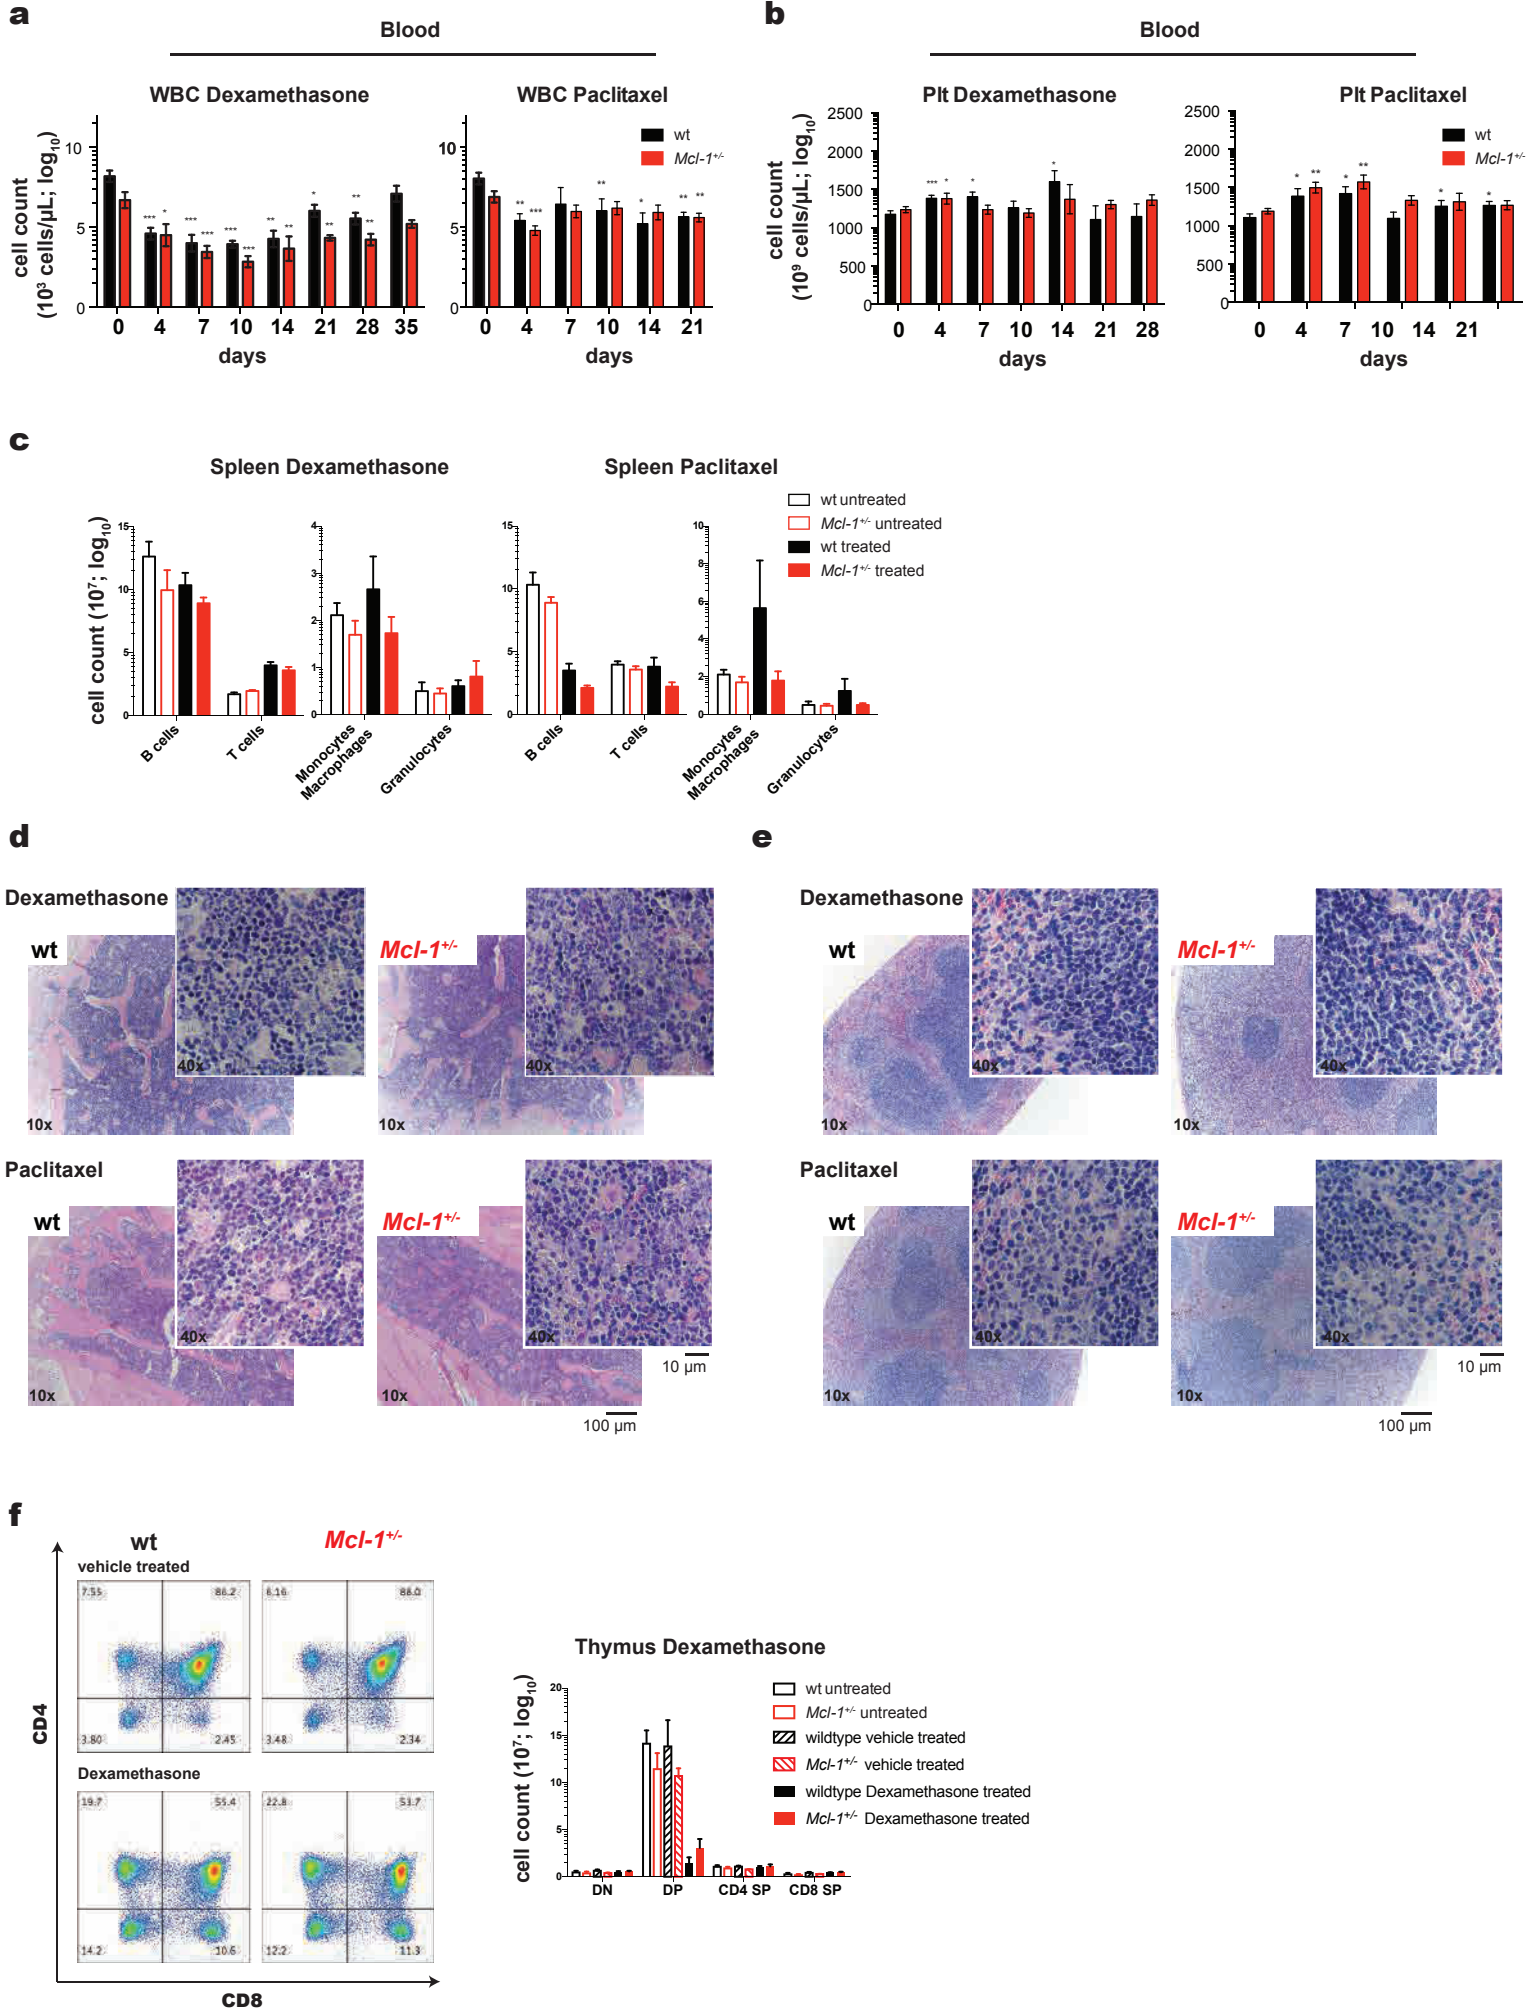

# Supplementary Figure S6:

**a**

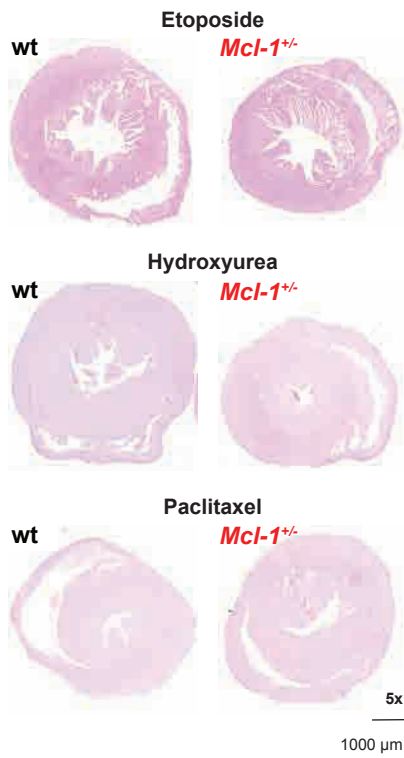

**b**

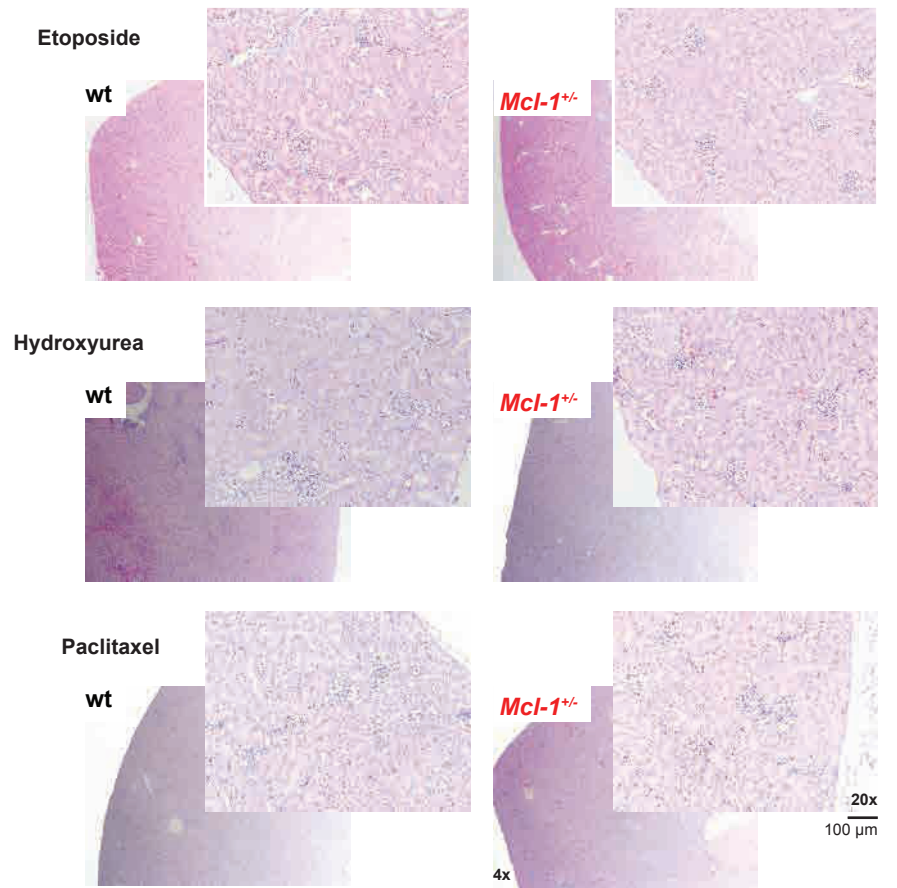

**c**

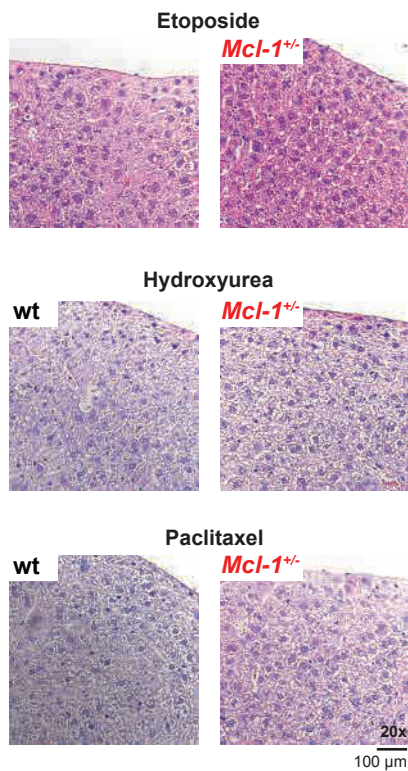

1 **Supplementary Figure Legends**

2

3 **Supplementary Figure S1**

4 **Reduction in MCL-1 levels causes a significant albeit**  
5 **minor reduction in certain blood cell subsets. (a)**

6 Intracellular FACS staining for MCL-1, BIM, BCL-XL and  
7 BCL-2 protein in the indicated cell populations of the  
8 blood, spleen, bone marrow and thymus. The different  
9 haematopoietic cell subsets were identified by staining  
10 with surface marker specific antibodies. Data represent  
11 relative mean fluorescence intensity (MFI)  $\pm$ SEM for  
12 cells from wild-type (wt,  $n \geq 5$ ) and *Mcl-1*<sup>+/-</sup> mice ( $n \geq 5$ ).

13 \* $p < 0.05$ , \*\* $p < 0.01$ , \*\*\* $p < 0.001$  (Student t test, 2 tailed,  
14 unpaired, comparing wild-type with *Mcl-1*<sup>+/-</sup> mice). **(b)**

15 Flow cytometric analysis of the indicated cell populations  
16 (%) in the blood of wild-type ( $n=7$ ) and *Mcl-1*<sup>+/-</sup> mice  
17 ( $n=7$ ). **(c)** Median corpuscular volume (MCV), median

18 haemoglobin content (MCH) of red blood cells and **(d)**  
19 platelet (Ptl) numbers, were determined in the blood of  
20 wild-type ( $n=42$ ) and *Mcl-1*<sup>+/-</sup> ( $n=54$ ) mice. Data  
21 represent mean  $\pm$ SEM. \* $p < 0.05$ , \*\* $p < 0.01$ , \*\*\* $p < 0.001$

22 (Student t test, 2 tailed, unpaired). **(e)** Histological  
23 analysis of H&E-stained sections of the spleens of wild-  
24 type and *Mcl-1*<sup>+/-</sup> mice.

25

26 **Supplementary Figure S2**

27 **Overview of chemotherapeutic drugs and treatment**  
28 **regimes.**

29

30 **Supplementary Figure S3**

31 **Reduction in MCL-1 levels only moderately**  
32 **exacerbates the haematopoietic cytopenia caused**  
33 **by drugs that interfere with DNA synthesis. (a) White**

34 blood cell (WBC) and **(b) platelet (Plt) numbers were**  
35 determined in wild-type (wt) and *Mcl-1*<sup>+/-</sup> mice at the  
36 indicated time points post-treatment with 5-FU (left  
37 panel; wild-type n=8; *Mcl-1*<sup>+/-</sup> n=8), Cytarabine (middle  
38 panel; wild-type n=10; *Mcl-1*<sup>+/-</sup> n=9) or Hydroxyurea (right  
39 panel; wild-type n=12; *Mcl-1*<sup>+/-</sup> n=11). Data represent  
40 mean ±SEM. \*p<0.05, \*\*p<0.01, \*\*\*p<0.001 (Student t  
41 test, 2 tailed, paired, compared to untreated). **(c) Flow**

42 cytometric analysis of total spleen cells in wild-type and  
43 *Mcl-1*<sup>+/-</sup> mice 7 days post-treatment with 5-FU (left panel;  
44 wild-type n=3; *Mcl-1*<sup>+/-</sup> n=3), Cytarabine (middle panel;  
45 wild-type n=6; *Mcl-1*<sup>+/-</sup> n=6) or Hydroxyurea (right panel;  
46 wild-type n=3; *Mcl-1*<sup>+/-</sup> n=3) compared to untreated wild-  
47 type (n=7) and *Mcl-1*<sup>+/-</sup> (n=7) mice. Data represent mean  
48 ±SEM. \*p<0.05 (Student t test, 2 tailed, unpaired,  
49 comparing wild-type with *Mcl-1*<sup>+/-</sup> mice). **(d) Flow**  
50 cytometric analysis of long-term haematopoietic stem



51 cells (LT-HSC) in the bone marrow (total cell count per  
52 one femur) identified by staining with a cocktail of  
53 lineage marker specific antibodies and antibodies to  
54 detect CD48 and CD150 in wild-type and *Mcl-1<sup>+/-</sup>* mice 7  
55 days post-treatment with 5-FU (left panel; wild-type n=5;  
56 *Mcl-1<sup>+/-</sup>* n=5) or Cytarabine (right panel; wild-type n=3;  
57 *Mcl-1<sup>+/-</sup>* n=3) compared to untreated wild-type (n=5) and  
58 *Mcl-1<sup>+/-</sup>* (n=5) mice. Data represent mean  $\pm$ SEM.  
59 \*p<0.05, (Student t test, 2 tailed, unpaired, comparing  
60 the indicated groups). Histological analysis of H&E-  
61 stained sections of the bone marrow (sternum) **(e)** and  
62 spleen **(f)** of wild-type and *Mcl-1<sup>+/-</sup>* mice treated with 5-  
63 FU (21 days post-treatment, upper panel), Cytarabine  
64 (28 days post-treatment, middle panel) or Hydroxyurea  
65 (21 days post-treatment, lower panel).

66

#### 67 **Supplementary Figure S4**

68 **Reduction in MCL-1 levels only moderately**  
69 **exacerbates haematopoietic cytopenia caused by**  
70 **DNA double strand break-inducing drugs. (a)** White  
71 blood cell (WBC) numbers, **(b)** platelet (Plt) numbers, **(c)**  
72 haemoglobin (HCT) content and **(d)** haematocrit (HGB)  
73 were determined in wild-type (wt) and *Mcl-1<sup>+/-</sup>* mice at the  
74 indicated time points post-treatment with Doxorubicin  
75 (wild-type n=9; *Mcl-1<sup>+/-</sup>* n=8) (left panel) or Etoposide

76 (wild-type n=8; *Mcl-1*<sup>+/-</sup> n=8) (right panel). Data represent  
77 mean ±SEM. \*p<0.05, \*\*p<0.01, \*\*\*p<0.001 (Student t  
78 test, 2 tailed, paired, compared to untreated). **(e)** Flow  
79 cytometric analysis of total spleen cells in wild-type and  
80 *Mcl-1*<sup>+/-</sup> mice 7 days post-treatment with Doxorubicin (left  
81 panel, wild-type n=3: *Mcl-1*<sup>+/-</sup> n=3) or Etoposide (right  
82 panel, wild-type n=3: *Mcl-1*<sup>+/-</sup> n=3) compared to  
83 untreated wild-type (n=7) and *Mcl-1*<sup>+/-</sup> mice (n=7). Data  
84 represent mean ±SEM. p>0.5 (n.s.) (Student t test, 2  
85 tailed, unpaired, comparing wild-type with *Mcl-1*<sup>+/-</sup> mice).  
86 Histological analysis of H&E-stained sections of the bone  
87 marrow (sternum) **(f)** and spleen **(g)** of wild-type and  
88 *Mcl-1*<sup>+/-</sup> mice 28 days post-treatment with Doxorubicin  
89 (upper panel) or Etoposide (lower panel).

90

#### 91 **Supplementary Figure S5**

92 **Reduction in MCL-1 levels does not drastically**  
93 **exacerbate haematopoietic cytopenia caused by**  
94 **non-DNA-damaging chemotherapeutic drugs.** White  
95 blood cell (WBC) **(a)** and platelet (Plt) **(b)** numbers were  
96 determined in wild-type (wt) and *Mcl-1*<sup>+/-</sup> mice at the  
97 indicated time points post-treatment with  
98 Dexamethasone (left panel) or Paclitaxel (right panel).  
99 Data represent mean ±SEM. \*p<0.05, \*\*p<0.01,  
100 \*\*\*p<0.001 (Student t test, 2-tailed, paired, compared to

101 untreated mice). **(c)** Flow cytometric analysis of total  
102 spleen cells in wild-type and *Mcl-1<sup>+/-</sup>* mice 7 days post-  
103 treatment with Dexamethasone (left panel; wild-type  
104 n=3; *Mcl-1<sup>+/-</sup>* n=3) or Paclitaxel (right panel, wild-type  
105 n=3; *Mcl-1<sup>+/-</sup>* n=3) compared to untreated wild-type (n=7)  
106 and *Mcl-1<sup>+/-</sup>* mice (n=7). Data represent mean  $\pm$ SEM.  
107  $p>0.5$  (n.s.) (Student t test, 2 tailed, unpaired, comparing  
108 wild-type with *Mcl-1<sup>+/-</sup>* mice). Histological analysis of  
109 H&E-stained sections of the bone marrow (sternum) **(d)**  
110 and the spleen **(e)** of wild-type and *Mcl-1<sup>+/-</sup>* mice treated  
111 with Dexamethasone (35 days post-treatment, upper  
112 panel) or Paclitaxel (21 days post-treatment, lower  
113 panel), respectively. **(f)** Representative examples of flow  
114 cytometric analysis of thymic T lymphoid cell populations  
115 identified by staining for CD4 and CD8 (left panel). Data  
116 are presented as mean  $\pm$ SEM of total numbers of the  
117 indicated cell subsets in the thymi from wild-type  
118 (untreated: n=7, vehicle: n=2, Dexamethasone: n=3) and  
119 *Mcl-1<sup>+/-</sup>* (untreated: n=7, vehicle: n=2, Dexamethasone:  
120 n=3) mice (right panel).  $p>0.5$  (n.s.) (Student t test, 2  
121 tailed, unpaired, comparing wild-type with *Mcl-1<sup>+/-</sup>* mice).  
122 DN=double negative; DP=double positive; SP single  
123 positive thymocytes.

124

125 **Supplementary Figure S6**

126 **Reduction in MCL-1 levels does not cause cardio-,**  
127 **nephro- or hepato-toxicity.** Histological analysis of  
128 H&E-stained sections of the **(a)** heart, **(b)** kidney and **(c)**  
129 liver of wild-type and *Mcl-1*<sup>+/-</sup> mice treated with Etoposide  
130 (28 days post-treatment, upper panel), Hydroxyurea (21  
131 days post-treatment, middle panel), or Paclitaxel (21  
132 days post-treatment, lower panel).  
133
